# Supplementary material for: Multiscale environmental characterization of Aldrovanda vesiculosa in the Danube Delta, Romania
Source: Research Square preprint supplement (doi:10.21203/rs.3.rs-6936198/v1), 2025-07-14
Supplement: Supplementary file 1 [file 283003a864f48dcd7fc1901a.xlsx]

## Sheet: Sheet1
Table 1. Presence and ecological characteristics of A. vesiculosa in four EUNIS habitat types
EUNIS habitat	No. total of individuals	No. of individuals/	Water depth (cm)	Length of A. vesiculosa individuals (cm)	Ecological observations
		m2
C1.32 Free-floating vegetation of eutrophic waterbodies	210	210	12	11	Optimal habitat: floating vegetation, shallow water, maximum density and length, excellent light and nutrient conditions.
N1H Atlantic and Baltic moist and wet dune slack	186	37	27.6	7.43	Habitat characterized by deep, poorly oxygenated water, vegetation with floating leaves, moderate density and length, and possible presence in bright microzones.
Q51 Tall-helophyte bed	1829	30	16.8	7.78	Most common habitat; moderate density and length; eutrophic conditions; present in interspaces in reed beds; favorable but suboptimal.
Q53 Tall-sedge bed	5	5	10	6	Marginal and temporary habitat; shallow depth, limited light due to dense sedge; minimum density and length.
Table 2. Chemical composition of the sediments at sampling points in Perișor
Sediments samples	pH	NO2	NO3	N-NH4	NH4	NH3	CO3-	HCO3-	Chlorides	Cl	Mg	Organic carbon	Humus
		(mg/ 100g soil)										%
Per01s	8.33	0.0008	0.373	0.007	0.009	0.008	0	3.05	35.45	3.407	4.013	2.923	5.04
Per02s	8.46	0.0009	0.326	0.007	0.009	0.008	0	4.575	23.04	3.607	1.702	3.48	6
Per03s	8.56	0.0006	0.362	0.006	0.008	0.007	0	2.898	33.68	3.607	1.216	1.392	2.4
Table 3. Physico-chemical parameters of the water at sampling points in Perișor
Water samples	pH	T	EC	TDS	NH₄⁺	N-NO2	N-NO3	Organic N	N total	Inorganic N	P-PO4 mg/l	Total P	H	Chlo	Cl
													CO3-	rides
		(⁰C)	(µs/	(mg/ L)
			cm)
Per01w	7.77	21	1285	643	0.126	0.026	0.034	4.552	4.612	0.186	0.016	0.054	335.5	230.4	84.97
Per02w	7.75	21	999	499	0.133	0.008	0.03	3.068	3.106	0.171	0.015	0.046	335.5	156	59.31
Per03w	7.78	21	2130	1065	0.217	0.035	0.079	5.132	5.246	0.331	0.022	0.057	445.3	553.1	73.74
